# 1 Kidney Shape Statistical Analysis: 2 Associations with Disease and 3 Anthropometric Factors

4  
5 Marjola Thanaj<sup>1</sup>, Nicolas Basty<sup>1</sup>, Madeleine Cule<sup>2</sup>, Elena P Sorokin<sup>2</sup>, Brandon Whitcher<sup>1</sup>,  
6 Ramprakash Srinivasan<sup>2</sup>, Rachel Lennon<sup>3,4</sup>, Jimmy D Bell<sup>1</sup>, E Louise Thomas<sup>1</sup>

7  
8 1 Research Centre for Optimal Health, School of Life Sciences, University of Westminster,  
9 London, United Kingdom,

10 2 Calico Life Sciences LLC, South San Francisco, CA, United States,

11 3 Wellcome Centre for Cell-Matrix Research, Division of Cell-Matrix Biology and Regenerative  
12 Medicine, School of Biological Sciences, Faculty of Biology Medicine and Health, Manchester  
13 Academic Health Science Centre, The University of Manchester, Manchester, United  
14 Kingdom,

15 4 Department of Paediatric Nephrology, Royal Manchester Children's Hospital, Manchester  
16 University Hospitals NHS Foundation Trust, Manchester Academic Health Science Centre,  
17 Manchester, United Kingdom.

## 18 19 **Abstract**

20  
21 **Background:** Organ measurements derived from magnetic resonance imaging (MRI) have  
22 the potential to enhance our understanding of the precise phenotypic variations underlying  
23 many clinical conditions.

**NOTE:** This preprint reports new research that has not been certified by peer review and should not be used to guide clinical practice.

24 **Methods:** We applied morphometric methods to study the kidneys by constructing surface  
25 meshes from kidney segmentations from abdominal MRI data in 38,868 participants in the UK  
26 Biobank. Using mesh-based analysis techniques based on statistical parametric maps  
27 (SPMs), we were able to detect variations in specific regions of the kidney and associate those  
28 with anthropometric traits as well as disease states including chronic kidney disease (CKD),  
29 type-2 diabetes (T2D), and hypertension. Statistical shape analysis (SSA) based on principal  
30 component analysis was also used within the disease population and the principal component  
31 scores were used to assess the risk of disease events.

32 **Results:** We show that CKD, T2D and hypertension were associated with kidney shape. Age  
33 was associated with kidney shape consistently across disease groups. Body mass index (BMI)  
34 and waist-to-hip ratio (WHR) were also associated with kidney shape for the participants with  
35 T2D. Using SSA, we were able to capture kidney shape variations, relative to size, angle,  
36 straightness, width, length, and thickness of the kidneys, within disease populations. We  
37 identified significant associations between both left and right kidney length and width and  
38 incidence of CKD (hazard ratio (HR): 0.74, 95% CI: 0.61-0.90,  $p < 0.05$ , in the left kidney; HR:  
39 0.76, 95% CI: 0.63-0.92,  $p < 0.05$ , in the right kidney) and hypertension (HR: 1.16, 95% CI:  
40 1.03-1.29,  $p < 0.05$ , in the left kidney; HR: 0.87, 95% CI: 0.79-0.96,  $p < 0.05$ , in the right kidney).

41 **Conclusions:** The results suggest that shape-based analysis of the kidneys can augment  
42 studies aiming at the better categorisation of pathologies associated with acute and chronic  
43 kidney conditions.

44

45 **Key Words:** Magnetic Resonance Imaging, Kidney Volume, 3D mesh-derived phenotype,  
46 Statistical Parametric Maps, Statistical Shape Analysis, Chronic Kidney Disease, Type-2  
47 Diabetes, Hypertension.

48

49 **Abbreviations:** CKD: chronic kidney disease; T2D: type 2 diabetes; BMI: body mass index;  
50 WHR: waist-to-hip ratio; eGFR: estimated glomerular filtration rate; MUR: mass univariate

51 regression; TFCE: threshold-free cluster enhancement; SPMs: statistical parametric maps;  
52 SSA: Statistical Shape Analysis; PCA: principal component analysis; S2S: Surface-to-surface.

53

## 54 **Introduction**

55

56 The incidence of conditions such as chronic kidney disease (CKD), type-2 diabetes  
57 (T2D), and hypertension are rising and are amongst the leading causes of death globally [1].  
58 The prevalence of CKD, which increases with age, is significantly common among older  
59 people, with an adverse effect on longevity [2]. Progression of CKD is generally tracked as a  
60 gradual decline in glomerular filtration rate (GFR), however there are suggestions that  
61 changes in kidney volume occur much earlier in the disease process and can accurately  
62 predict disease [3, 4]. Changes in kidney volume, as well as kidney length and structure, have  
63 additionally been reported in metabolic diseases including obesity, T2D, and hypertension,  
64 these act as drivers of CKD progression reducing kidney function [5–7].

65 Recently the automated segmentation and measurement of kidney volume from  
66 magnetic resonance imaging (MRI) has become more commonplace, enabling rapid  
67 measurement and the ability to obtain detailed anatomical information [8]. While this advance  
68 has enhanced our understanding of the kidney at a population level, additional knowledge  
69 regarding morphological changes and regional variation in response to particular conditions  
70 are still lacking.

71 Three-dimensional (3D) mesh-derived phenotypes capture additional information  
72 related to morphological and regional organ variation using statistical parametric maps (SPMs)  
73 and may be used to map more subtle differences between a healthy and diseased state. A  
74 similar approach is statistical shape analysis (SSA), which can be used to transform the  
75 spatially correlated data into a smaller number of principal components and characterise  
76 variations in organ shape across a population. These morphometric analyses offer a way to  
77 model the human body non-invasively and have been widely used to model bones [9, 10],  
78 abdominal organs [11–13], the brain [14, 15], the heart [16, 17] and the aorta [18, 19].

79 However, they have been less frequently applied to abdominal organs, despite known  
80 morphological changes occurring in clinical conditions [3].

81 In the current study, we have applied computational image analysis to identify factors  
82 associated with variation in kidney shape in a region-specific manner and assessed whether  
83 this can be used to identify morphological variation associated with CKD, T2D, and  
84 hypertension. We further investigated whether the emerging 3D kidney mesh-derived  
85 phenotypes can add to the prediction of disease outcomes.

86

## 87 **Methods**

88

### 89 *Data*

90 Full details regarding the UK Biobank abdominal MRI acquisition protocol have  
91 previously been reported [20]. The data included here focused on the neck-to-knee Dixon MRI  
92 acquisitions. All data were processed and segmented using automated methods [8].

93 Participant data from the UK Biobank cohort was obtained through UK Biobank  
94 Access Application number 44584. The UK Biobank has approval from the North West Multi-  
95 Centre Research Ethics Committee (REC reference: 11/NW/0382). All methods were  
96 performed in accordance with the relevant guidelines and regulations, and informed consent  
97 was obtained from all participants. Researchers may apply to use the UKBB data resource by  
98 submitting a health-related research proposal that is in the public interest. Additional  
99 information may be found on the UK Biobank researchers and resource catalogue pages  
100 ([www.ukbiobank.ac.uk](http://www.ukbiobank.ac.uk)).

101

### 102 *Quality Control*

103 Participants with missing clinical, anthropometric, or biochemical data, as well as those  
104 with Dixon MRI datasets that did not have full anatomical coverage, were excluded from the  
105 study (i.e organs with zero volumes). We further performed quality control by visually  
106 inspecting potential outliers in the 3D kidney mesh-derived phenotype (i.e. extremely high

107 values). To ensure comprehensive anatomical coverage, we also discarded kidney  
108 segmentations with volumes less than 30 ml from our analysis. For consistency in the sample  
109 size, participants with missing data or segmentations below the lower limit threshold for one  
110 kidney were excluded from the study even if the other kidney had full coverage. Overall, from  
111 the initial 44,455 participants, data from of 5,587 participants did not pass quality control and  
112 were excluded from the final analysis (12.6% of the dataset excluded, of which 47% were  
113 male,  $64.7 \pm 7.8$  years old, with a BMI  $26.3 \pm 4.5$  kg/m<sup>2</sup> [mean  $\pm$  standard deviation (SD)]),  
114 leaving a final dataset of 38,868 participants.

115

## 116 *Study Design*

### 117 *Phenotype Definitions*

118 Anthropometric measurements including age, body mass index (BMI), waist and hip  
119 circumferences, and systolic and diastolic blood pressure were taken at the UK Biobank  
120 imaging visit, and ethnicity was defined based on the self-reported ethnic background at the  
121 initial assessment visit (field: 21000). For the purpose of our analysis we categorised ethnic  
122 background as follows: 0 for "White" and 1 for any other non-white ethnic background (due to  
123 small numbers of non-white participants in this dataset (3.1%)). Sex was self-reported and  
124 included those recorded by the NHS and those obtained at the initial assessment visit (field:  
125 31).

126 Biological samples for serum creatinine (field: 30700) were measured in *millimole/L*,  
127 sodium in urine (field: 30530) in *millimole/L* and urea (field: 30670) in *millimole/L* units were  
128 taken on the initial assessment visit. Estimated glomerular filtration rate (eGFR) was  
129 calculated based on the CKD-EPI creatinine equation (2009) [21] as follows:

$$130 \text{ eGFR} = 141 \times \min(\text{Scr}/\kappa, 1)^\alpha \times \max(\text{Scr}/\kappa, 1)^{-1.209} \times 0.993^{\text{Age}} [\times 1.018 \text{ if female}], \quad [\times$$

131  $1.159 \text{ if black}]$ .

132 where *Scr* is serum creatinine in converted into *mg/dL* units,  $\kappa$  is 0.7 for females and 0.9 for  
133 males,  $\alpha$  is  $-0.329$  for females and  $-0.411$  for males, *min* is the minimum of *Scr*/ $\kappa$  or 1, and

134 *max* is the maximum of  $Scr/k$  or 1. In the aforementioned equation, ethnicity for “Black” was  
135 defined based on the continental genetic ancestry for “African” ancestry  
136 (<https://pan.ukbb.broadinstitute.org>) and if missing from the self-reported ethnic background  
137 (field: 21000) for “Black or Black British”.

138 Questionnaire information from the UK Biobank imaging visit was used to determine  
139 alcohol intake frequency (field: 1558), smoking status (field: 20116), and usage of ibuprofen  
140 medication (field: 6154, field: 20003). For our analysis, we categorised alcohol intake  
141 frequency as 1 for “Daily or almost daily” and 0 otherwise and smoking status as 1 for “Current”  
142 and 0 for “Previous” and “Never”. It should be noted that the UK Biobank initial assessment  
143 visit preceded the imaging visit by  $9 \pm 1.7$  years.

144

#### 145 *Association between mesh-derived phenotypes and disease*

146 To assess the associations between the 3D mesh-derived phenotype, and the  
147 anthropometric covariates, we analysed the data of 38,868 UK Biobank participants.

148 We selected diseases known to be associated with kidney health, and those previously  
149 associated with changes in kidney volume [8]. In part, this was also guided by the number of  
150 patients available in the UK Biobank with diseases of interest. We included participants with  
151 chronic kidney disease (CKD), and T2D as well as participants with hypertension (see Disease  
152 Definitions in supporting information and supplementary Table S1).

153

#### 154 *Image Registration and Mesh Construction*

155 The process for organ template construction has been previously detailed in [22, 23].  
156 Here, we constructed a template using the kidney segmentations from a sex-balanced  
157 European ancestry cohort of 200 participants. The characteristics of the template population  
158 are provided in Supplementary Table S2. We then constructed 3D surface meshes from the  
159 template image and all participants’ segmentations using the marching cubes algorithm and  
160 smoothed using a Laplacian filter [24]. Supplementary Fig. S1 illustrates a brief diagram for  
161 the construction of average kidney template meshes.

162 The registration process has been previously detailed in [23]. In brief, we used rigid  
163 registration to remove the position and orientation difference between all participant-specific  
164 surfaces and template surfaces. Then we registered the template to the participant's  
165 segmentations via affine and non-rigid registration. The template mesh was then propagated  
166 to each participant mesh using the deformation fields obtained from the non-rigid registration.  
167 Hence, all surface meshes are parameterised with the same number of vertices  
168 (approximately 4,000) ensuring each vertex was anatomically accurate and consistent across  
169 all participants while preserving the size and shape information for subsequent analysis. All  
170 the steps for the template-to-subject registration were performed using the Image Registration  
171 Toolkit (IRTK) (<https://biomedica.doc.ic.ac.uk/software/irtk>).

172 To determine the regional outward or inward adaptations in kidney surface in  
173 comparison to an average kidney shape for each participant, the surface-to-surface (S2S)  
174 distance was measured by computing the signed distance between the template surface and  
175 the participants' surface mesh at each vertex [23].

176

### 177 *Mass Univariate Regression Analysis*

178 Associations between S2S distances and anthropometric variables were estimated  
179 using a linear regression framework. The linear regression model is expressed as follows:

$$180 Y = X\beta + \epsilon ,$$

181 where,  $Y$  is a  $n_s \times n_v$  matrix containing  $n_s$  subjects from a sample of the population under  
182 study and  $n_v$  is the number of voxels in the mesh,  $X$  is the  $n_s \times p$  design matrix of  $p$  known  
183 covariates (including the intercept) and the relevant variables for each subject.  $X$  is related to  
184  $Y$  by the vector of the estimated regression coefficients  $\hat{\beta}$ . Finally  $\epsilon$  is a  $n_s \times n_v$  matrix which  
185 is independent and identically distributed across the subjects and is assumed to be a zero-  
186 mean Gaussian process [25]. We applied threshold-free cluster enhancement (TFCE) [26]  
187 and permutation testing to assess the associations between S2S distances and

188 anthropometric covariates, adjusted for relevant covariates with the correction to control the  
189 false discovery rate (FDR), as previously described [22].

190 Specifically, we performed an SPM framework, mass univariate regression (MUR)  
191 analysis using a refined version of the R package *mutools3D* [27] adjusted for multiple  
192 comparisons by applying the FDR procedure using the Benjamini-Hochberg method [28] to all  
193 the TFCE-derived p-values for each vertex and each model using 1,000 permutations. The  
194 estimated regression coefficients  $\hat{\beta}$  for each of the relevant covariates and their related TFCE-  
195 derived p-values after correction for multiple testing, were then displayed at each vertex in the  
196 mesh on the whole 3D kidney anatomy, providing the spatially-distributed associations. The  
197 MUR model for deriving associations between clinical parameters and a 3D phenotype is  
198 outlined in supplementary Fig. S2.

199 To determine which factors were associated with kidney shape and size, we fitted a  
200 linear regression model for each vertex with age, sex, ethnicity, BMI, waist-to-hip ratio (WHR),  
201 alcohol drinker status, smoking status, ibuprofen medication, sodium in urine, urea, CKD, T2D,  
202 and hypertension as predictors and applied a correction to control the FDR. It is well known  
203 that the number of nephrons decreases with age which can contribute to the decline in kidney  
204 function [4]. Hence, to investigate whether there was a stronger relationship in terms of  
205 accelerating change between age and CKD, T2D, and hypertension we included interaction  
206 terms between age and all clinical conditions. We then included interaction terms between  
207 BMI and T2D, and between WHR and T2D, as markers of obesity, to investigate whether there  
208 is a change in kidney function caused by hyperfiltration. We further performed a sex-stratified  
209 analysis, producing two models for male and female separately, using all the aforementioned  
210 variables apart from sex. All continuous variables, including the S2S distances, were  
211 standardised prior to being included in the regression models.

212

### 213 *Statistical Shape Analysis*

214 Statistical shape analysis (SSA) is a technique defined by the variation of the size and  
215 shape (represented using a surface mesh) across participants. Principal component analysis



216 (PCA) is a widely explored dimensionality reduction approach applied in SSA for constructing  
217 3D statistical shape models [29, 30]. The principal directions of variation, also called modes  
218 of variation, could be represented by eigenvectors calculated from PCA. This technique finds  
219 a new coordinate system that describes the input data so that the greatest variance of the data  
220 lies on the first coordinate (the first principal component mode), the second-largest variance  
221 of the data that is orthogonal to the first component mode on the second coordinate, and so  
222 on. In this study, we performed PCA on the full cohort (N=38,868) to explore whether these  
223 coefficients for the principal components known as shape parameters can characterise  
224 variations in kidney shape across the population.

225

### 226 *Survival Analysis*

227 Cox proportional hazards models were used to assess the risk of disease outcomes  
228 that occurred after the imaging visit. These models were adjusted for relevant covariates to  
229 account for potential confounding factors. To reduce the dimensionality of the S2S distances,  
230 we performed SSA by computing the PCA within each disease cohort and extracted the  
231 principal component (PC) scores.

232 To determine the unique contribution of each kidney measurement and ensure robust  
233 statistical significance of associations, we employed separate models for each kidney (left and  
234 right). This approach allowed us to account for potential confounding and effectively capture  
235 the specific associations between the kidney measures and disease outcomes. In these  
236 separate models, we adjusted for a comprehensive set of covariates including age, sex,  
237 ethnicity, body mass index, waist-to-hip ratio, alcohol intake frequency, smoking status,  
238 ibuprofen medication, sodium in urine, urea, kidney volume and the first four principal  
239 component scores of the S2S distances.

240 Disease outcomes and dates of the first occurrence of CKD, T2D, and hypertension  
241 were defined based on a combination of hospital records, primary care records, self-report,  
242 and death records (see Disease Definitions in supporting information and supplementary  
243 Table S1). Time-to-event was censored at the first event for each outcome, death, or last

244 recorded follow-up (10th of February 2022), with a median of 3.7 years follow-up period since  
245 the imaging visit. Participants with an event recorded prior to the imaging visit were excluded.

246 Model summaries are reported as hazard ratios with 95% confidence intervals (CI). To  
247 control for multiple testing, the FDR procedure was estimated from the p-values, and a  
248 threshold of  $FDR < 0.05$  determined significance.

249

## 250 **Results**

251

### 252 *Study Population Characteristics*

253 Of the cohort of 38,868 participants 96.9% were white and 48.3% male, with an age  
254 range between 44 and 82 years, and a mean BMI  $26.5 \pm 4.3$  kg/m<sup>2</sup> (supplementary Table S3).  
255 We identified 1,134 participants with CKD (581F/553M), age  $69 \pm 6.9$  years and a BMI  $27.8 \pm$   
256  $4.7$  kg/m<sup>2</sup>, 2,054 participants with T2D from which 66% were male, age  $66.6 \pm 7.3$  years and  
257 BMI  $29.7 \pm 5.2$  kg/m<sup>2</sup> and 14,113 participants with hypertension of which 58% male; age  $66.8$   
258  $\pm 7.2$  years; BMI  $28 \pm 4.6$  kg/m<sup>2</sup>.

259 From all participants with CKD, defined by an eGFR below 60 ml/min/1.73 m<sup>2</sup>, codes  
260 for chronic kidney disease, kidney dialysis, and kidney transplantation operation codes  
261 (supplementary Table S1), 466 (41.1%) participants had an eGFR below 60 ml/min/1.73 m<sup>2</sup>  
262 ( $53.8 \pm 6.1$ , mean  $\pm$  SD; 21.2 - 60 ml/min/1.73 m<sup>2</sup>, range) and 793 participants were identified  
263 based on the codes for diagnosis. Hence, from the participants diagnosed with CKD (N=793),  
264 only 125 had eGFR below the aforementioned levels (supplementary Fig. S3). From the  
265 14,113 participants with hypertension defined as self-reported of hypertensive medication, or  
266 a prior diagnosis of hypertension, or mean blood pressure  $\geq 140/90$  mmHg (see Disease  
267 Definitions in supporting information and supplementary Table S1), only 4,326 (30.7%) had  
268 mean blood pressure measurements  $\geq 140/90$  mmHg (supplementary Fig. S4).

269

## 270 *Associations with Anthropometric Characteristics and Disease*

271 We proceeded to register the 200 healthy participant template on the full cohort  
272 (N=38,868), computing S2S distances between the template and surface of each individual  
273 kidney mesh, and performed MUR analysis to generate SPMs, adjusting for all relevant  
274 covariates. A summary of the model for the whole cohort, representing the standardised  
275 regression coefficients for each covariate and the significance areas on the kidney, is provided  
276 in Table 1, Table 2, and supplementary Fig. S5-S6. The SPMs that represent associations  
277 between S2S distances and the anthropometric measurements are shown in Fig. 1.

278 S2S distances were negatively associated with age, showing a median shape variation  
279 of -0.1 covering over 89.8% of the left kidney, and a median shape variation of -0.08 covering  
280 78.3% of the right kidney, observed in the inferior and superior areas of both kidneys. There  
281 was also a positive association between age and S2S distances with a median shape variation  
282 of 0.03 covering only 5.5% of the left kidney and a median shape variation of 0.03 covering  
283 12.4% of the right kidney, shown in the anterior and posterior areas of both kidneys. BMI and  
284 WHR had statistically significant positive associations with S2S distances, covering 85% and  
285 55% of the left kidney surface and 87.3% and 62.8% of the right kidney, respectively. Alcohol  
286 intake frequency showed a statistically significant outward shape variation with a median of  
287 0.07 in both kidneys, whereas smoking status showed a statistically significant outward shape  
288 variation with a median of 0.12 in the left kidney and 0.13 in the right kidney. Ibuprofen  
289 medication showed a median outward shape variation in S2S distances of 0.04 in both kidneys  
290 (significance area = 84.3% for the left kidney and 83.2% for the right kidney). We further  
291 examined the associations between S2S distances and biological markers including sodium  
292 in urine and urea. Sodium in urine showed a statistically significant positive association with  
293 S2S distances with a median shape variation of 0.02 (significance area = 48.8%) in both  
294 kidneys. Urea showed a median inward shape variation with S2S distances of -0.06  
295 (significance area = 88.8%) in the left kidney and -0.06 (significance area = 91.8%) in the right  
296 kidney.

297           A diagnosis of CKD was associated with S2S distances with a median shape variation  
298   of -0.33 (significance area = 91.6%) in the left kidney and -0.30 (significance area = 94.7%) in  
299   the right kidney. T2D was positively associated with S2S distances, with a median shape  
300   variation of 0.20 in both kidneys covering a significant area of 85.5% of the left kidney and a  
301   significant area of 87.8% of the right kidney. Finally, hypertension showed median outward  
302   shape variation in S2S distances of 0.06 covering 67.4% of the left kidney and 0.07 covering  
303   79.8% of the right kidney.  
304

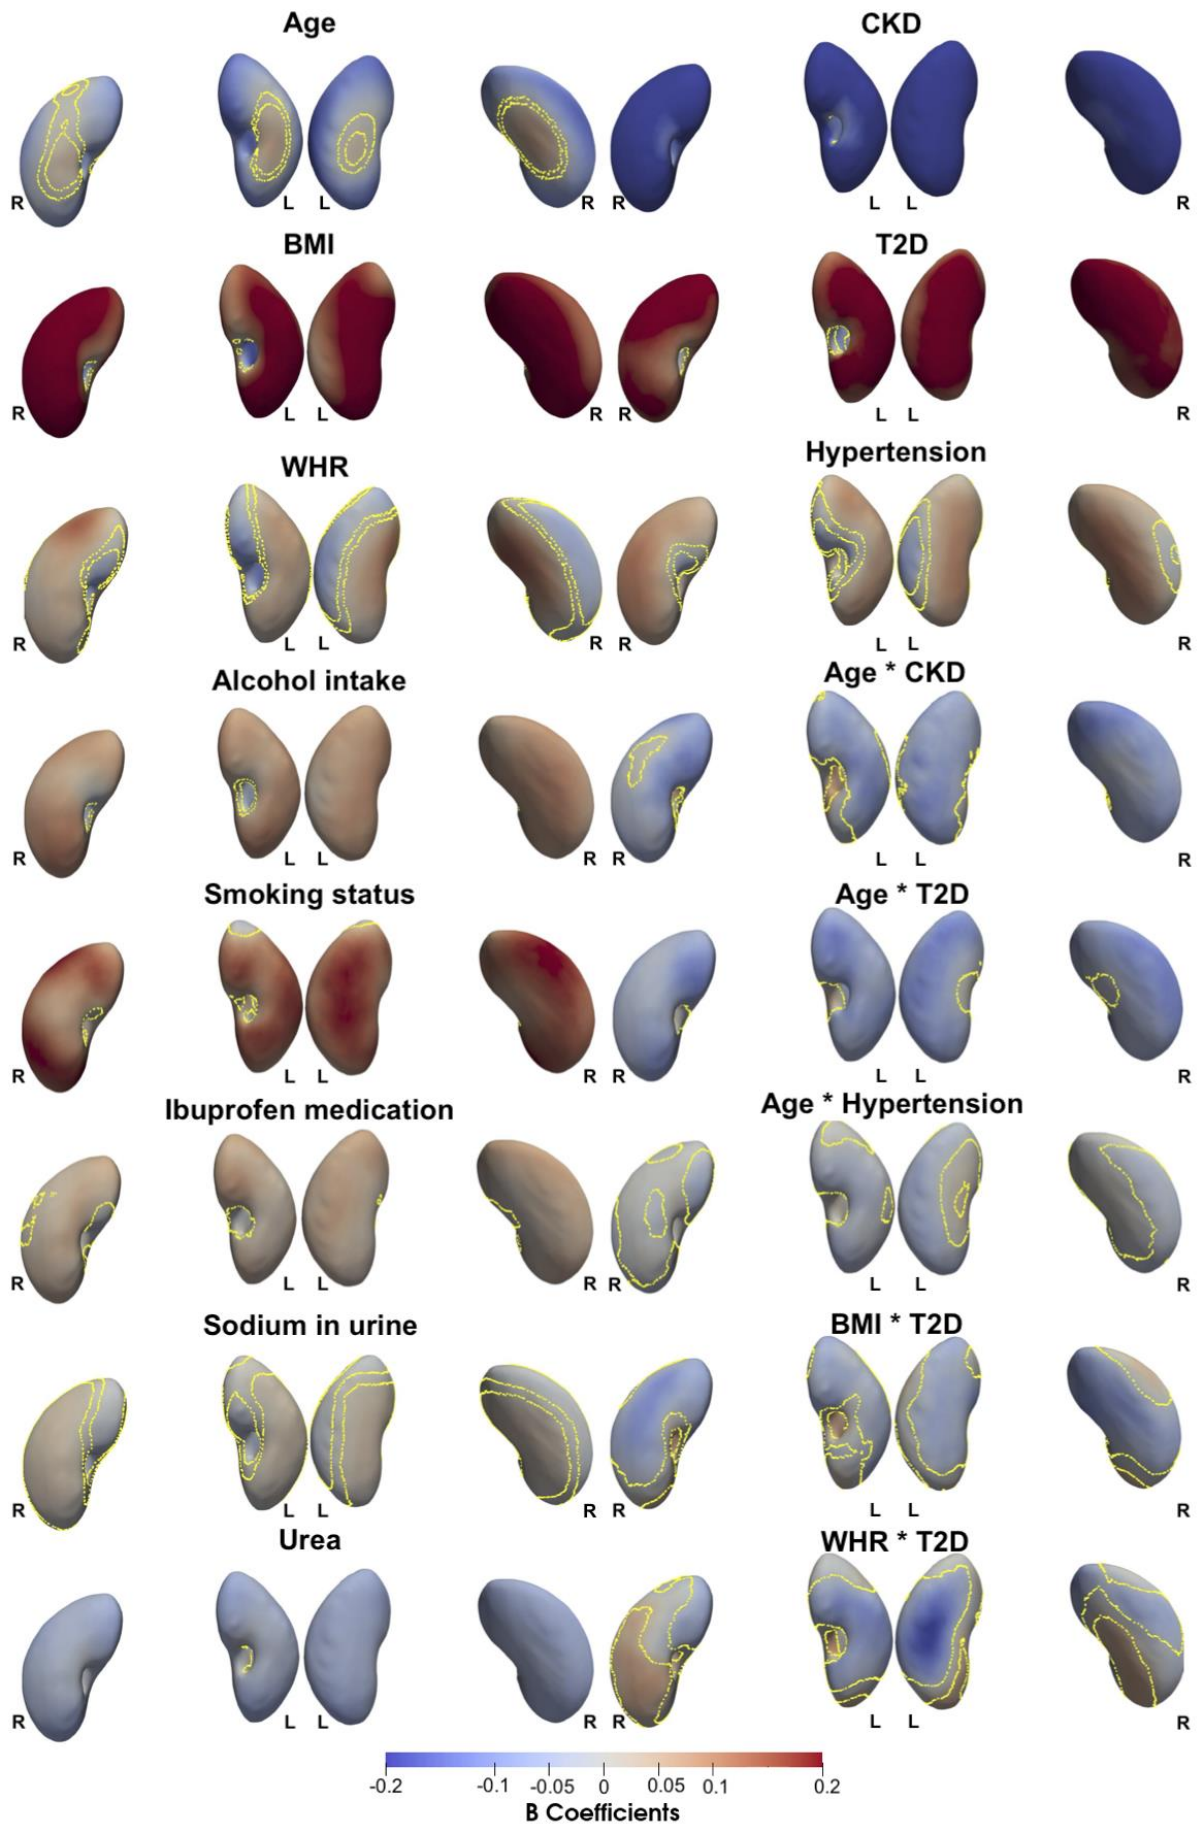

306 **Figure 1.** Three-dimensional statistical parametric maps (SPMs) of kidney morphology,  
 307 projections are anterior and posterior views for both left (L) and right (R) kidneys in both  
 308 anterior (left plots) and posterior (right plots) views. The SPMs show the local strength of  
 309 association for each covariate in the model with S2S distances on the full cohort (N=38,868).  
 310 Yellow contour lines indicate the boundary between statistically significant regions ( $p < 0.05$ )  
 311 after correction for multiple testing, with positive associations in bright red and negative  
 312 associations in bright blue. The standardised regression coefficients ( $\hat{\beta}$ ) are shown with units  
 313 in standard deviations for each covariate.  
 314

| Left Kidney                     | Standardised $\hat{\beta} < 0$ |                   | Standardised $\hat{\beta} > 0$ |                   | Total             |
|---------------------------------|--------------------------------|-------------------|--------------------------------|-------------------|-------------------|
|                                 | Beta coefficients              | Significance area | Beta coefficients              | Significance area | Significance area |
| <b>Age</b>                      | -0.10 (0.07)                   | 89.84%            | 0.03 (0.02)                    | 5.5%              | 95.32%            |
| <b>BMI</b>                      | -0.10 (0.07)                   | 14.79%            | 0.20 (0.09)                    | 85%               | 99.79%            |
| <b>WHR</b>                      | -0.04 (0.04)                   | 37.44%            | 0.04 (0.03)                    | 54.98%            | 92.42%            |
| <b>Alcohol intake frequency</b> | -0.06 (0.03)                   | 14.47%            | 0.07 (0.02)                    | 84.43%            | 98.9%             |
| <b>Smoking status</b>           | -0.05 (0.01)                   | 3.88%             | 0.12 (0.05)                    | 84.36%            | 88.24%            |
| <b>Ibuprofen medication</b>     | -0.04 (0.03)                   | 0.5%              | 0.04 (0.02)                    | 84.27%            | 84.77%            |
| <b>Sodium in urine</b>          | -0.02 (0.02)                   | 31.05%            | 0.02 (0.01)                    | 48.81%            | 79.86%            |

|                           |              |        |               |        |        |
|---------------------------|--------------|--------|---------------|--------|--------|
| <b>Urea</b>               | -0.06 (0.01) | 88.84% | 0.02 (0.02)   | 6.6%   | 95.43% |
| <b>CKD</b>                | -0.33 (0.11) | 91.6%  | 0.09 (0.04)   | 3.74%  | 95.34% |
| <b>T2D</b>                | -0.06 (0.02) | 1.78%  | 0.20 (0.08)   | 85.5%  | 87.28% |
| <b>Hypertension</b>       | -0.03 (0.02) | 19.59% | 0.06 (0.04)   | 67.44% | 87.03% |
| <b>Age * CKD</b>          | -0.06 (0.03) | 67.31% | 0.06 (0.02)   | 9.54%  | 76.85% |
| <b>Age * T2D</b>          | -0.06 (0.03) | 89.98% | 0.002 (0.002) | 0.07%  | 90.05% |
| <b>Age * Hypertension</b> | -0.03 (0.02) | 71.39% | 0.02 (0.003)  | 1%     | 72.4%  |
| <b>BMI * T2D</b>          | -0.05 (0.02) | 59%    | 0.05 (0.02)   | 5.09%  | 64.09% |
| <b>WHR * T2D</b>          | -0.07 (0.04) | 49.93% | 0.05 (0.02)   | 8.97%  | 58.9%  |

315 **Table 1.** Significance areas for covariates in the MUR model between the anthropometric  
 316 covariates (N=38,868) in the model for the left kidney. The total area has been split into areas  
 317 of positive, negative, and total associations. The standardised regression coefficients ( $\hat{\beta}$ ) are  
 318 presented as median (interquartile range - IQR) across all vertices of the left kidney surface  
 319 and the significance areas as a percentage (%) of the vertices with statistically significant  
 320 associations.

321

| <b>Right Kidney</b> | <b>Standardised <math>\hat{\beta} &lt; 0</math></b> |                   | <b>Standardised <math>\hat{\beta} &gt; 0</math></b> |                   | <b>Total</b>      |
|---------------------|-----------------------------------------------------|-------------------|-----------------------------------------------------|-------------------|-------------------|
|                     | Beta coefficients                                   | Significance area | Beta coefficients                                   | Significance area | Significance area |
| <b>Age</b>          | -0.07 (0.05)                                        | 78.32%            | 0.03 (0.03)                                         | 12.43%            | 90.75%            |



|                                 |              |        |             |        |        |
|---------------------------------|--------------|--------|-------------|--------|--------|
| <b>BMI</b>                      | -0.14 (0.03) | 12.46% | 0.23 (0.07) | 87.35% | 99.81% |
| <b>WHR</b>                      | -0.05 (0.07) | 27.26% | 0.04 (0.05) | 62.82% | 90.08% |
| <b>Alcohol intake frequency</b> | -0.05 (0.02) | 12.77% | 0.07 (0.02) | 85.77% | 98.54% |
| <b>Smoking status</b>           | -0.06 (0.02) | 2.13%  | 0.13 (0.05) | 92.17% | 94.3%  |
| <b>Ibuprofen medication</b>     | -0.01 (0.01) | 0.48%  | 0.04 (0.01) | 83.21% | 83.68% |
| <b>Sodium in urine</b>          | -0.02 (0.02) | 35.36% | 0.02 (0.01) | 48.78% | 71.61% |
| <b>Urea</b>                     | -0.06 (0.02) | 91.78% | 0.02 (0.02) | 4.91%  | 96.69% |
| <b>CKD</b>                      | -0.30 (0.13) | 94.66% | 0.09 (0.03) | 2.54%  | 97.29% |
| <b>T2D</b>                      | -0.06 (0.02) | 6.97%  | 0.20 (0.05) | 87.76% | 94.73% |
| <b>Hypertension</b>             | -0.04 (0.03) | 10.76% | 0.07 (0.05) | 79.76% | 90.51% |
| <b>Age * CKD</b>                | -0.06 (0.04) | 72.54% | 0.06 (0.02) | 3.74%  | 76.28% |
| <b>Age * T2D</b>                | -0.06 (0.03) | 89.84% | -           | -      | 89.84% |
| <b>Age * Hypertension</b>       | -0.02 (0.01) | 40.97% | 0.01 (0.01) | 0.19%  | 41.16% |
| <b>BMI * T2D</b>                | -0.07 (0.04) | 59.63% | 0.06 (0.03) | 14.23% | 73.86% |
| <b>WHR * T2D</b>                | -0.05 (0.02) | 22.28% | 0.05 (0.03) | 28.56% | 50.84% |



322 **Table 2.** Significance areas for covariates in the MUR model between the anthropometric  
323 covariates (N=38,868) in the model for the right kidney. The total area has been split into areas  
324 of positive, negative, and total associations. The standardised regression coefficients ( $\hat{\beta}$ ) are  
325 presented as median (interquartile range - IQR) across all vertices of the left kidney surface  
326 and the significance areas as a percentage (%) of the vertices with statistically significant  
327 associations.

328

329 We undertook further analysis to determine whether there was an interaction between  
330 all clinical conditions and age-adjusted for all covariates in the model. We observed a stronger  
331 relationship between age and S2S distances with a median inward shape variation of -0.16 in  
332 CKD participants, compared with -0.10 in non-CKD participants in the left kidneys covering an  
333 area of 67.3% and median shape variation in S2S distances of -0.13 in CKD participants,  
334 covering an area of 72.5% compared with -0.07 in non-CKD participants in the right kidney  
335 (Table 2,3 and Fig. 1). The association between age and S2S distances in participants with  
336 CKD and without a clinical condition are directly compared in Fig. 2i and 2ii. Participants with  
337 T2D (Fig. 2iii) display a stronger relationship with S2S distances with a median inward shape  
338 variation of -0.16 in 90% of the left kidney and a median inward shape variation of -0.12 in  
339 89.8% of the right kidney with increasing age. Participants with hypertension (Fig. 3iv) showed  
340 a similar relationship with S2S distances with increasing age with a median inward shape  
341 variation of -0.13 covering an area of 71.4% in the left kidney and with a median inward  
342 variation of -0.09 in 41% of the right kidney.

343

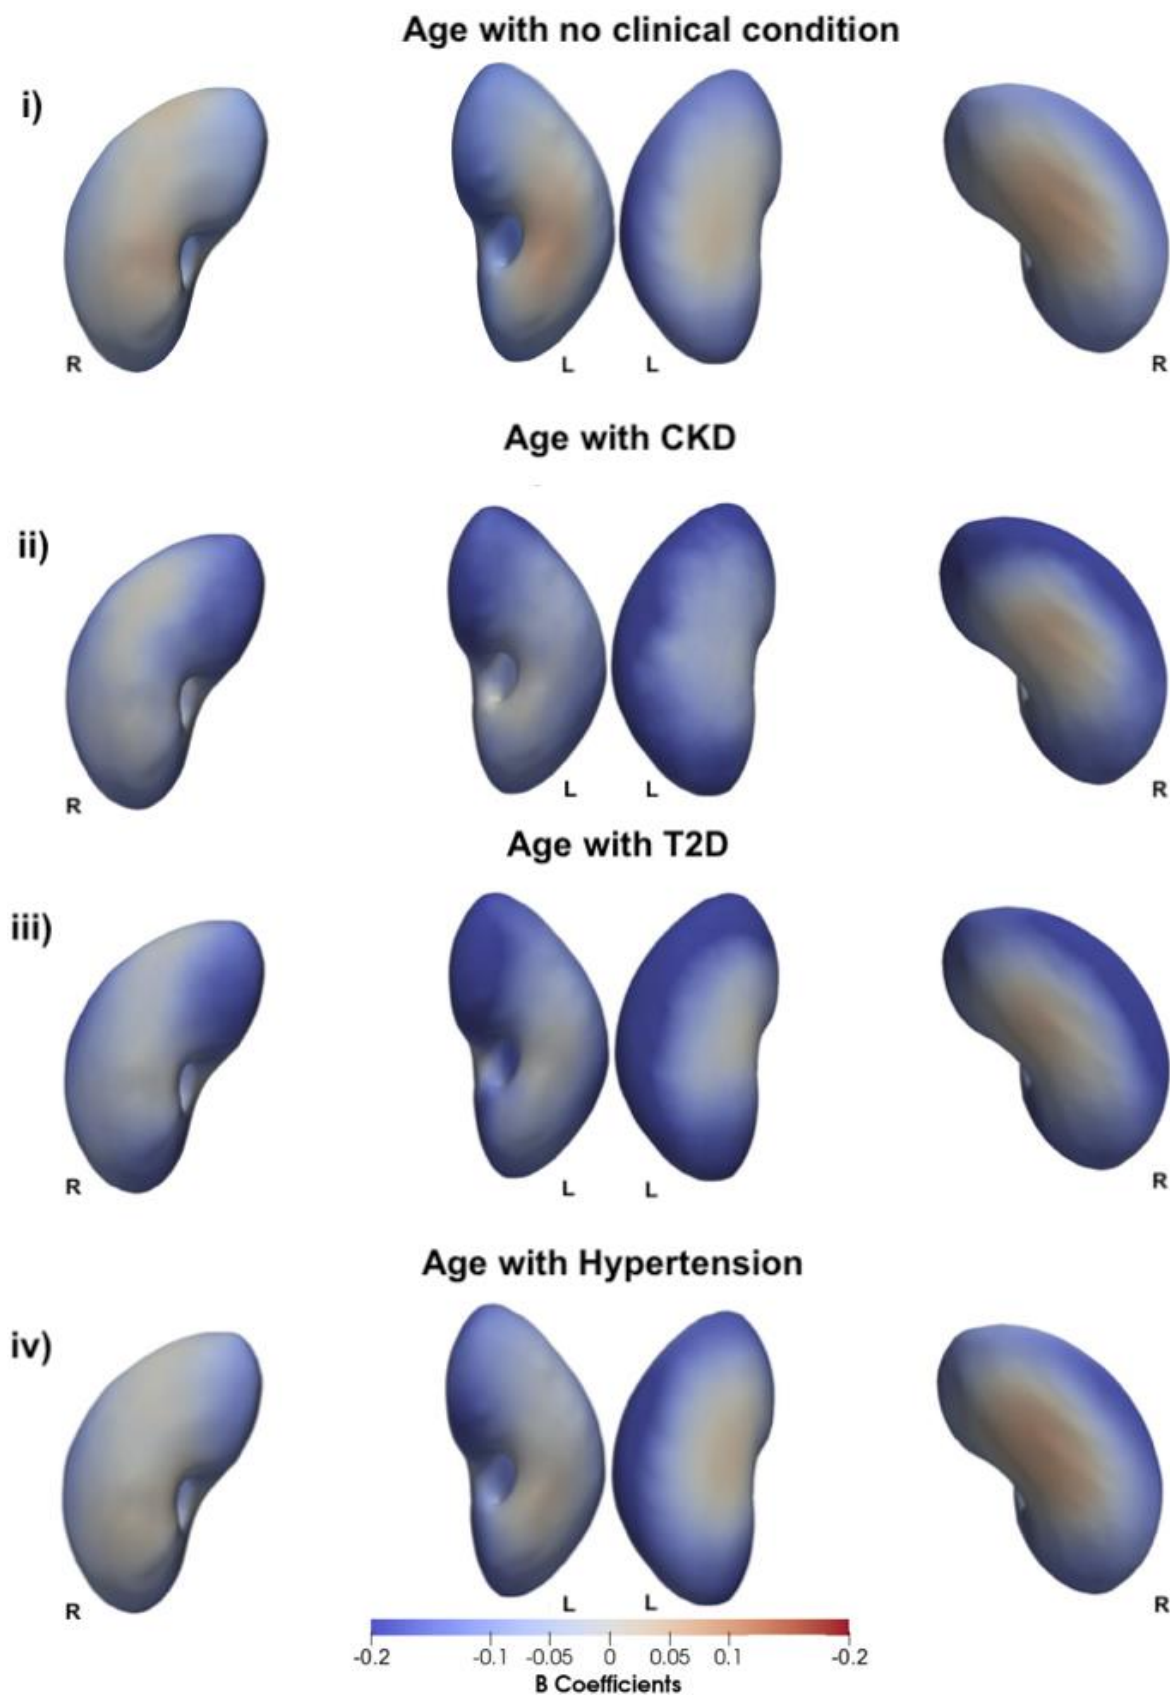

344

345 **Figure 2.** Three-dimensional statistical parametric maps (SPMs) of kidney morphology,  
346 projections are anterior (left plots) and posterior (right plots) views for both left (L) and right

347 (R) kidneys. The SPMs show the local rate of change as a function of age for S2S distances  
348 in participants **i)** without CKD, T2D, or hypertension, **ii)** with CKD, **iii)** with T2D, and **iv)** with  
349 hypertension in the full cohort (N=38,868). Positive associations are in red and negative  
350 associations are in blue. Regression coefficients ( $\hat{\beta}$ ) are shown with units in standard  
351 deviations.

352

353 We further investigated whether there was an interaction between T2D and BMI as  
354 well as WHR adjusted for all covariates in the model (Table 1, 2, and Fig. 1). BMI in  
355 participants with T2D showed a stronger relationship with S2S distances with a median  
356 outward shape variation 0.05 covering only a small significance area of only 5.1% of the left  
357 kidney and a median outward shape variation of 0.06 covering an area of 14.2% of the right  
358 kidney in addition to the median outward shape variation of 0.20 in the left kidney (significance  
359 area = 85%) and 0.23 in the right kidney (significance area = 87.4%) for the main effect of  
360 BMI. However, we observed a stronger relationship in S2S distances with a median inward  
361 shape variation of -0.05 over an area of 59% in the left kidney and a median inward shape  
362 variation of -0.07 covering an area of 59.6% in the right kidney for the main effect of BMI (Fig.  
363 3i, 3ii).

364 From the interaction between WHR and T2D (Tables 1 and 2, and Fig. 1), we observed  
365 a stronger relationship with S2S distances with a median outward shape variation of 0.05 in  
366 the left kidney (significance area = 9%) and 0.05 in the right kidney (significance area =  
367 28.6%), in addition to the median shape variation of 0.04 in the left kidney (significance area  
368 = 55%) and 0.04 in the right kidney (significance area = 62.8%) for the main effect of WHR.  
369 However, we also found a stronger relationship in S2S distances with a median inward shape  
370 variation of -0.07 (significance area = 50%) in addition to the median shape variation of -0.04  
371 (significance area = 37.4%) in the left kidney and -0.05 (significance area = 22.3%) in addition  
372 to the median shape variation of -0.05 (significance area = 27.3%) in the right kidney for the  
373 main effect of WHR (Fig. 3iii, 3iv).

374

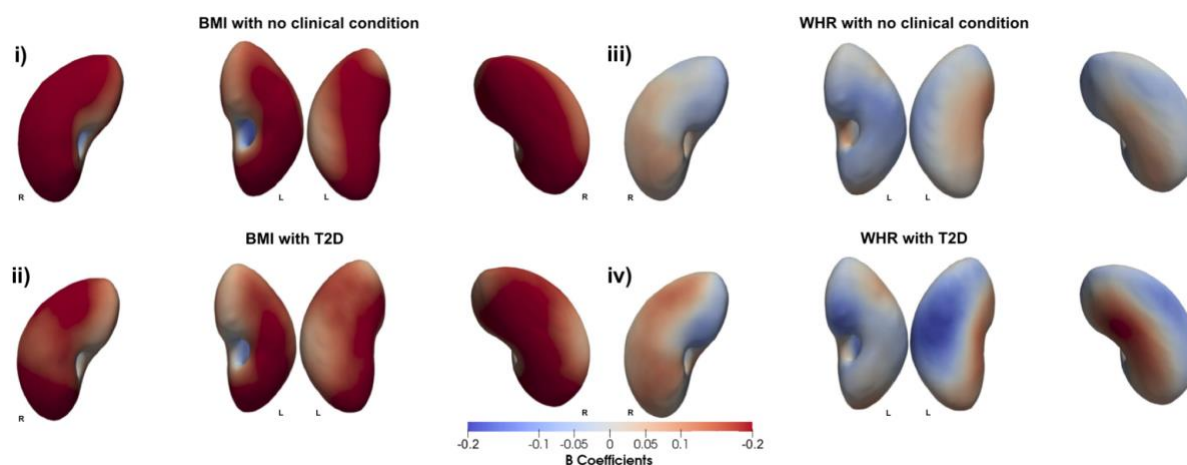

375

376 **Figure 3.** Three-dimensional statistical parametric maps (SPMs) of kidney morphology,  
377 projections are anterior (left plots) and posterior (right plots) views for both left (L) and right  
378 (R) kidneys. **i)** The SPMs show the local rate of change as a function of BMI for S2S distances  
379 in participants without T2D and **ii)** with T2D, **iii)** SPMs show the local rate of change as a  
380 function of WHR for S2S distances in participants without T2D and **iv)** with T2D on the full  
381 cohort (N=38,868). Positive associations are in red and negative associations in blue.  
382 Regression coefficients ( $\hat{\beta}$ ) are shown with units in standard deviations.

383

#### 384 *Associations by Sex*

385 We performed MUR analysis to explore the associations between kidney shape and  
386 anthropometric and disease traits separated by sex, adjusting for all relevant covariates  
387 excluding sex. A summary of the model for the whole cohort, representing the standardised  
388 regression coefficients and the significance areas on the kidney is provided in supplementary  
389 Table S4, and Table S5, and the histograms showing the statistically significant standardised  
390 regression coefficients is provided in supplementary Fig. S7-S8. The SPMs that represent  
391 associations between S2S distances and the anthropometric measurements with units in  
392 standard deviations for each covariate are shown in Fig. S9 for male (N=18,855) and Fig. S10  
393 for female participants (N=20,013).

394 We observed similar associations with the model including the full cohort for both  
395 sexes. However, we noticed that the WHR in both the left and right kidneys showed more

396 statistically significant negative associations with S2S distances in male participants (median  
397 inward shape variation = -0.05 in both kidneys; significance area = 71.4% in the left kidney;  
398 45.5% in the right kidney) and more statistically significant positive associations in female  
399 participants (median outward shape variation = 0.05, significance area = 74.9% in the left  
400 kidney; median outward shape variation = 0.04, 66.2% in the right kidney) (supplementary  
401 Table S4, Table S5).

402 We also observed the interaction between age and all disease outcomes, BMI and  
403 T2D as well as WHR and T2D for male and female participants, separately. Female  
404 participants with CKD showed a strong relationship with S2S distances with a median inward  
405 shape variation of -0.09 in the left kidney (significance area = 29.8%) and -0.08 in the right  
406 kidney (significance area = 65.8%), in addition to the median shape variation of -0.10  
407 (significance area = 85.3%) in the left kidney and -0.08 (significance area = 74.1%) in the right  
408 kidney for the main effect of age. While, male participants with CKD showed a strong  
409 relationship with S2S distances with a median inward shape variation of -0.10 in the left kidney  
410 (significance area = 44.8%) and -0.11 in the right kidney (significance area = 18.5%), in  
411 addition to the median shape variation of -0.10 (significance area = 91.1%) in the left kidney  
412 and for -0.08 (significance area = 79.4%) in the left kidney the main effect of age. We further  
413 found that both male and female participants with T2D showed a strong relationship with S2S  
414 distances showing a greater significance area in male participants with a median inward shape  
415 variation of -0.08 (significance area = 82%) in the left kidney and -0.07 in the right kidney  
416 (significance area = 85.6%), for the main effect of age. Furthermore, male participants with  
417 hypertension showed a stronger relationship with S2S distances for the main effect of age,  
418 with a median inward shape variation of -0.03 in both kidneys (significance area = 40.3% in  
419 the left kidney and 49.6% in the right kidney).

420 Interactions between BMI and T2D showed a strong relationship with S2S distances  
421 in both sexes although, a greater significance area was observed in men with a median inward  
422 shape variation of -0.08 for both kidneys covering a significance area of 67% of the left kidney  
423 and 80.5% of the right kidney. Finally, male participants with T2D showed a strong relationship

424 with S2S distances for the main effect of WHR, with a median outward shape variation of 0.07  
425 in the left kidney (significance area = 15.4%) and a median outward shape variation of 0.08 in  
426 the right kidney (significance area = 22.6%), while female participants with T2D showed a  
427 median inward shape variation of -0.08 in the left kidney (significance area = 28.9%) for the  
428 main effect of WHR.

429

### 430 *Statistical Shape Analysis*

431 To visualise shape variation across a population, we computed the PCA of the  
432 coordinate system including the S2S distances from the full cohort (N=38,868). The first four  
433 modes of kidney size and shape variation from the PCA are presented as -3 SD, mean and  
434 +3 SD (Fig. 4i and supplementary video S1).

435 The principal components are mathematically derived, so they do not necessarily  
436 correspond to physical features but they can be broadly interpreted by visualising extreme  
437 values along each axis (+/- 3 SD). The percentage of shape variation explained by the first ten  
438 modes of PCA for both left and right kidneys on the full cohort is presented in supplementary  
439 Fig. S11. The first principal component accounted for 39.5% of the shape variation for the left  
440 kidney and 41.2% for the right kidney and appeared to correspond best to the size of the  
441 kidney. The second principal component accounting for 7.5% of the shape variation for the left  
442 kidney and 8% for the right kidney, appeared to correspond to the angle of the superior end  
443 and the straightness of the kidney whereas the third principal component accounting for 6.5%  
444 of the shape variation for the left kidney and 5.6% for the right kidney, is visually associated  
445 with the length and width of the kidney. The fourth principal component appeared to be  
446 associated with the length and thickness (accounting for 3.8% of the shape variation for the  
447 left kidney and 4.4% for the right kidney). The remaining principal components are difficult to  
448 visually interpret.

449

### 450 *Survival Analysis*



451 We assessed whether the S2S distances had predictive value for the three disease  
452 outcomes diagnosed after the imaging visit. Here we identified 247 participants with CKD of  
453 which 59% were male, aged between  $68.6 \pm 6.5$  years (mean  $\pm$  SD) and a BMI between 16.4  
454 and  $48.9 \text{ kg/m}^2$ , 181 participants with T2D of which 61% were male, aged  $65.4 \pm 7.6$  years  
455 with a BMI between 19.5 and  $47.9 \text{ kg/m}^2$  and finally, 733 participants with hypertension (56.2%  
456 male; aged  $65.8 \pm 7.1$  years; BMI from 17.4 to  $53 \text{ kg/m}^2$ ). We created a model for each disease  
457 outcome adjusting for age, sex, ethnicity, body mass index, waist-to-hip ratio, alcohol intake  
458 frequency, smoking status, ibuprofen medication, sodium in urine, urea, kidney volume, and  
459 the first 4 PC scores for the S2S distances (accounting for over 60% of the variation in S2S  
460 distances in all disease outcomes and for both kidneys), separately for each kidney (Fig. 4ii  
461 for the left kidney; Fig. 4iii for the right kidney).

462 We found that the third PC scores of the S2S distances were risk factors for CKD  
463 diagnosis in both the left kidney (0.74 [0.61-0.90]) and the right kidney (0.76 [0.63-0.92]). No  
464 PC scores of the S2S distances in both left and right kidneys were associated with T2D. This  
465 may be attributed to the relatively short follow-up period from the imaging visit (median 3.7  
466 years, IQR 2.3 years) as well as the small number of incidences of T2D diagnosis (N=181),  
467 resulting in reduced statistical power to detect significant associations.

468 We further found that increased right kidney volume was a risk factor for hypertension  
469 (1.60 [1.15-2.22]). The third PC score of the S2S distances for the left kidney was significantly  
470 positively associated with risk of hypertension (1.16 [1.04-1.29]) however, PC3 score of the  
471 S2S distances for the right kidney was significantly negatively associated with risk of  
472 hypertension (0.87 [0.79-0.96]).

473

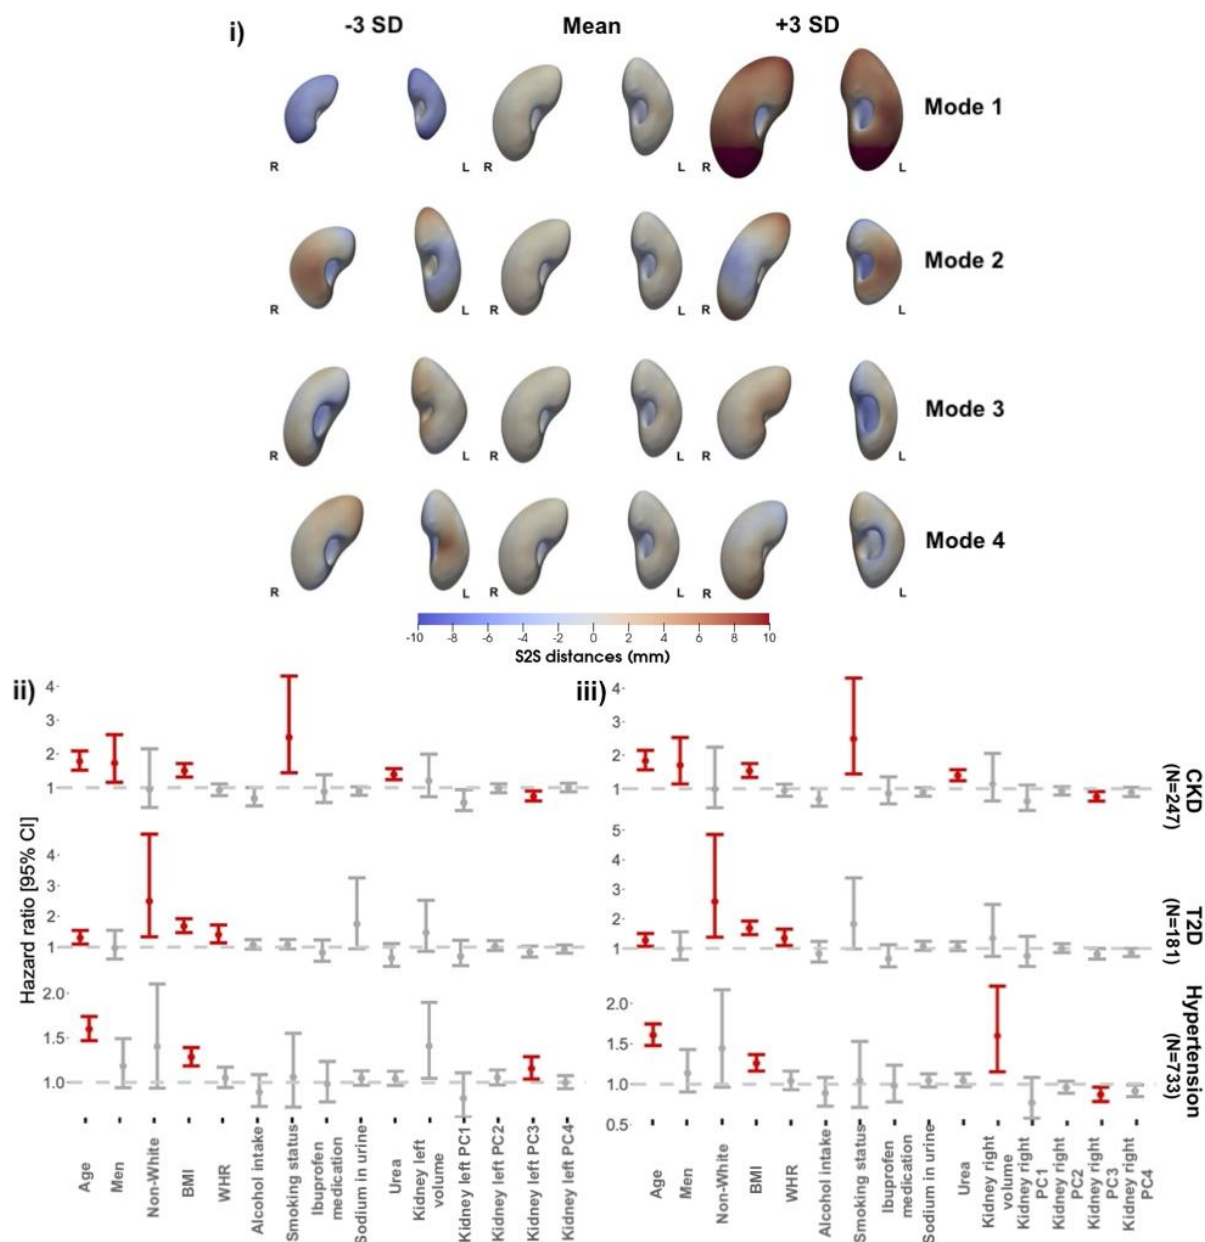

474

475 **Figure 4. i)** The first four modes of shape variation for the kidneys of the full cohort (N=38,868).

476 The mean shape and the shape at the +/- three SD are displayed for each mode showing the

477 S2S distance variation in mm. The kidney shape variations are shown in the anterior views for

478 both left (L) and right (R) kidneys. **ii)** Hazard ratios and 95% CIs for the three outcomes: CKD,

479 T2D, and hypertension for the left kidney. **iii)** Hazard ratios for the three disease outcomes

480 for the right kidney adjusted for age, sex, ethnicity, body mass index, waist-to-hip ratio, sodium

481 in urine, urea, alcohol intake frequency, smoking status, ibuprofen medication uptake, kidney

482 volume and the first 4 principal component scores for the S2S distances. Significant

483 associations for  $p < 0.05$  are shown in red and non-significant associations in grey.



484

## 485 **Discussion**

486

487           In this study, we mapped local shape variations across the kidneys and determined  
488 how these variations were associated with anthropometric and disease traits. To achieve this  
489 we constructed surface meshes from kidney segmentations of 38,868 participants from the  
490 UK Biobank. Previous studies using similar SPM techniques have suggested that this is a  
491 useful technique in neuroimaging [14] and cardiac imaging [16], for mapping the associations  
492 between phenotypic and genetic variation in specific anatomical regions.

493           Measurements of the kidneys have been extensively explored using a variety of  
494 approaches from computed tomography angiography (CTA) [31], ultrasound [6], computed  
495 tomography (CT), and MRI [32], with assessments including measurements of the whole  
496 organ as well as sub-structures including kidney cortex (the outer layer), medulla (the inner  
497 layer) and parenchyma (the tissue that forms the bulk of the kidneys composed of nephrons),  
498 and typically include measurement of size, length [33, 34], volume [3] and cortical thickness  
499 [35]. While these methods enhance our understanding of the kidneys in population-level  
500 studies, they may not be able to capture specific morphological and regional variations that  
501 occur in the kidneys in response to specific conditions. The SPM method implemented in this  
502 study demonstrates significant regional variations in each participant's kidney shape relative  
503 to an average kidney shape such that an outward or inward variation would add or subtract  
504 from the surface and illustrates their associations with anthropometric variables and disease  
505 outcomes. We believe that these novel phenotypic variables can be useful in longitudinal  
506 population studies, as well as in determining trajectories of progression in clinical conditions  
507 involving the kidneys, including CKD.

508           Our study provides an insight into the morphometric variations of both left and right  
509 kidney surface meshes and quantifies the anatomical relationships with age, sex, body  
510 composition, lifestyle, and disease including CKD, T2D, and hypertension. We demonstrate  
511 that age was significantly associated with a decrease in S2S distances observed in the inferior

512 and superior areas of both kidneys and was positively associated with S2S distances in the  
513 anterior and posterior areas of the kidneys. Previous studies investigating the kidney sub-  
514 structures of potential kidney donors found that cortical volume decreases with age and  
515 increases in medullary volume, with a slight difference in females [3]. Other studies  
516 investigating the parenchymal and total kidney volume of healthy individuals, found that kidney  
517 volume and length increased up to middle age followed by a continuous decrease in men and  
518 slowly decreased in women, suggesting some progressive loss of functional nephrons [36]. In  
519 our analysis, we found a similar decline in S2S distances with age for both sexes. However,  
520 future work will help to shed light on the shape variations from the kidney sub-structures such  
521 as the cortex and medulla.

522 We further found statistically significant positive associations between S2S distance  
523 and both BMI and WHR. Previous reviews of the associations between kidney measurements  
524 and BMI for different age, sex, and ethnicity groups, reported that the most significant factor  
525 related to kidney volume is BMI [37]. They also show that in most studies BMI showed a  
526 positive correlation with kidney size, length, or volume. Lifestyle factors including alcohol  
527 intake frequency and smoking were positively associated with S2S distances, showing median  
528 outward shape variations. Indeed, increased kidney volume has previously been associated  
529 with current smoking [3]. Furthermore, it has been shown that both smoking and heavy  
530 drinking are associated with kidney dysfunction and can contribute to the risk of glomerular  
531 hyperfiltration, CKD progression, and dementia [38, 39].

532 We found that the presence of CKD was associated with reduced S2S in both kidneys.  
533 From previous sonographic measurements of the kidneys, it has been shown that a reduction  
534 in kidney volume can be used as an indicator of CKD [40], enabling the use of kidney size for  
535 the prediction of kidney function in healthy populations as well as patients with CKD [41, 42].  
536 We further identified significant outward shape variations with the presence of T2D and  
537 hypertension which was consistent in both kidneys. It is known from previous studies that  
538 patients with non-insulin dependent diabetes mellitus develop enlarged kidneys with  
539 hyperfiltration [43]. Further studies investigating the associations of hyperfiltration and

540 hypofiltration with prediabetes and prehypertension show both diabetes and hypertension  
541 associate with hyperfiltration [44] however, another study showing independent associations  
542 between kidney volume and diastolic blood pressure did not find a significant association [3].

543 Interaction models within disease groups showed a stronger relationship between age  
544 and S2S distances in both kidneys with inward shape variation for all disease outcomes. More  
545 specifically our findings demonstrate that the added effect of age and CKD may further explain  
546 the inward shape variations in the kidneys' S2S distances. This could be explained by the loss  
547 of nephrons, which lead to the progressive loss of kidney function as CKD progresses [45].  
548 BMI and WHR also showed a stronger relationship with shape variations in participants with  
549 T2D. We also considered whether there are similar interactions for both sexes separately.  
550 When we considered the interaction between age and CKD, we found a stronger relationship  
551 with S2S distances with inward shape variation in both male and female participants. Both  
552 male and female participants with T2D showed a stronger relationship with S2S distances with  
553 inward shape variation for the main effect of age. Interactions between BMI and T2D showed  
554 a stronger relationship with S2S distances for both sexes although a greater significance area  
555 was observed in men. It is worth noting that due to the clinical heterogeneity of our current  
556 clinical cohort (CKD, T2D and hypertension), in terms of time of diagnosis and medication, as  
557 well as the possibility of collider bias or reverse confounding, it is impossible to identify causal  
558 mechanisms for the observed variation in S2S distances.

559 We further explored variations in kidney morphometry and demonstrated that the first  
560 four principal components of kidney shape were associated with size, angle, straightness,  
561 width, length and thickness of the kidneys. These observations are similar to the findings in  
562 [11], reporting that the kidney shape variations are heavily biased by organ size, angle,  
563 straightness, length-to-width ratio and length-to-thickness ratio. The rationale for this analysis  
564 was to capture SSA-based shape features of the kidneys that would be independent from  
565 current existing clinically available predictors such as kidney volume. However, future work is  
566 needed to condense the entire coordinate matrix or deformation conventional matrix into most

567 distinct modes to categorise population variations, which could be used in genetic association  
568 studies and enhance our understanding of kidney related diseases [46, 47].

569 We also investigated the risk of future disease outcomes adjusted for relevant  
570 anthropometric variables, kidney volumes as well as kidney S2S distances. Since S2S  
571 distances include high-dimensional data of vertices on the mesh, we applied PCA across all  
572 participants at each disease cohort and included the first four PC scores of the S2S distances,  
573 as they provide interpretable components. Our findings revealed contrasting associations  
574 between the SSA-based S2S variations corresponding to the length and width in the left and  
575 right kidneys with risk of hypertension. Specifically, we observed a significant positive  
576 association in the left kidney but a negative association in the right kidney. This difference may  
577 relate to the anatomical variations that predispose to atheroma in the renal artery which may  
578 then contribute to the associations with hypertension. This discrepancy may be also attributed  
579 to the significant anatomical differences in kidney length and width between the left and right  
580 sides. A previous study utilising sonographic measurements of renal size have also reported  
581 such disparities [48]. They also suggest that these differences may be attributed to the greater  
582 spatial capacity in the left kidney and a shorter length of the left renal artery compared to the  
583 right renal artery, resulting in increased blood flow and potentially an increase in kidney  
584 volume. We further demonstrated that variations corresponding to the length and width in the  
585 left and right kidney were associated with incidents of CKD. Previous studies measuring  
586 kidney size by ultrasonography, reported that kidney length and volume were correlated with  
587 eGFR levels in the elderly, however they report that kidney length had lower specificity in  
588 predicting kidney dysfunction [42]. Other studies investigating the accuracy of sonographic  
589 kidney measurements to detect kidney impairment and histological change, reported that  
590 kidney length to height ratio weighted for kidney echogenicity was able to detect kidney  
591 dysfunction [49]. Although these studies report the usefulness of the sonographic kidney  
592 measurements in detecting loss of kidney function, our study highlights the importance of the  
593 SSA-based shape features, in predicting the risk of future disease outcomes. More longitudinal

594 measurements and relevant outcome data will be required to evaluate whether the S2S  
595 variations alone are a useful measure in predicting risk of kidney disease.

596 Our study has limitations. The UK Biobank is a large cross-sectional study that is  
597 subject to selection bias with a “healthier” cohort than the wider UK population, who are  
598 predominantly of European ancestry, excludes younger participants and potentially more  
599 severe cases [50, 51]. However, it has been shown that risk factor associations are likely to  
600 be generalisable [52]. Another potential limitation of this study is that to ensure sufficient  
601 numbers of participants in the CKD group, we included both participants based on CKD  
602 diagnosis codes reported at the imaging visit and participants based on eGFR levels taken at  
603 the initial assessment visit which precedes the imaging visit of 9 years. Also, although  
604 albumin/creatinine ratio (ACR) is widely used to assess kidney function and diagnose diseases  
605 such as CKD, cardiovascular disease and diabetes [53, 54], this parameter was not used in  
606 this study as urine albumin was only available for 28% of the UK Biobank imaging cohort [55,  
607 56]. Furthermore, this study has only a 3.7 years follow-up period since the imaging visit, which  
608 may limit the power of time-to-event studies. Additional longitudinal measurements will need  
609 to be required to assess age-related changes in disease cohorts.

610

## 611 **Conclusions**

612

613 Our findings highlight the potential scientific and clinical significance of shape analysis  
614 techniques. We found statistically significant associations between S2S distances and disease  
615 outcomes including CKD, T2D and hypertension. We also identified significant associations  
616 between the SSA-based shape features corresponding to the size, length and width, and  
617 future events of disease outcomes. Therefore, the application of SPM and SSA-based shape  
618 analysis is feasible for improving our understanding of the variations in kidney shape  
619 associated with disease outcomes and their prediction. These techniques will benefit future  
620 research in population-based cohort studies, in identifying associations between physiological,

621 genetic and environmental effects on structure and function of the kidneys as well as the  
622 kidney sub-structures such as cortex and medulla.

623

#### 624 **Declarations**

625

#### 626 **Competing interests**

627 M.C., R.S. and E.P.S. are employees of Calico Life Sciences LLC. M.T., N.B., B.W., R.L.,  
628 J.D.B. and E.L.T. declare no competing interests.

629

#### 630 **Ethics approval and consent to participate**

631 The data resources used in this study have approval from ethics committees. Full anonymised  
632 images and participants metadata from the UK Biobank cohort was obtained through UK  
633 Biobank Access Application number 44584. The UK Biobank has approval from the North  
634 West Multi-Centre Research Ethics Committee (REC reference: 11/NW/0382), and obtained  
635 written informed consent from all participants prior to the study. All methods were performed  
636 in accordance with the relevant guidelines and regulations as presented by the relevant  
637 authorities, including the Declaration of Helsinki [https://www.ukbiobank.ac.uk/learn-more-  
638 about-uk-biobank/about-us/ethics](https://www.ukbiobank.ac.uk/learn-more-about-uk-biobank/about-us/ethics) .

639

#### 640 **Consent for publication**

641 Not applicable.

642

#### 643 **Availability of data and materials**

644 The data that support the findings of this study are available from the UK Biobank  
645 (<https://www.ukbiobank.ac.uk>), but restrictions apply to the availability of these data, which  
646 were used under license for the current study, and so are not publicly available. Data are  
647 however returned by us to the UK Biobank where they will be fully available on request.

648

649 **Funding**

650 This study was funded by Calico Life Sciences LLC.

651

652 **Author Contributions**

653

654 J.D.B., E.L.T., M.T. and M.C. conceived the study. R.L., J.D.B., B.W., E.L.T., and M.T.  
655 designed the study. M.T. and B.W. implemented the methods and performed the data  
656 analysis. M.T. defined the disease and physiological condition categories. M.T. performed the  
657 image and statistical analysis. R.L., E.L.T., B.W., M.T., J.D.B., E.P.S., R.S. and N.B. drafted  
658 the manuscript. All authors read and approved the manuscript.

659

660 **Acknowledgements**

661

662 We thank Alex Chekholko for providing technical support that expedited our work. This  
663 research has been conducted using the UK Biobank Resource under Application Number  
664 44584.

665

666 **References**

667

668 1. GBD 2016 Causes of Death Collaborators. Global, regional, and national age-sex specific  
669 mortality for 264 causes of death, 1980-2016: a systematic analysis for the Global Burden of  
670 Disease Study 2016. *Lancet*. 2017;390:1151–210.

671 2. Eckardt K-U, Coresh J, Devuyst O, Johnson RJ, Köttgen A, Levey AS, et al. Evolving  
672 importance of kidney disease: from subspecialty to global health burden. *Lancet*.

673 2013;382:158–69.

- 674 3. Wang X, Vrtiska TJ, Avula RT, Walters LR, Chakkerla HA, Kremers WK, et al. Age, kidney  
675 function, and risk factors associate differently with cortical and medullary volumes of the  
676 kidney. *Kidney Int.* 2014;85:677–85.
- 677 4. Hommos MS, Glassock RJ, Rule AD. Structural and Functional Changes in Human  
678 Kidneys with Healthy Aging. *J Am Soc Nephrol.* 2017;28:2838–44.
- 679 5. Habib SL. Kidney atrophy vs hypertrophy in diabetes: which cells are involved? *Cell*  
680 *Cycle.* 2018;17:1683–7.
- 681 6. Sans Atxer L, Roca-Cusachs A, Torra R, Calero F, Arias P, Ballarin J, et al. [Relationship  
682 between renal size and blood pressure profile in patients with autosomal dominant polycystic  
683 kidney disease without renal failure]. *Nefrologia.* 2010;30:567–72.
- 684 7. Sasson AN, Cherney DZ. Renal hyperfiltration related to diabetes mellitus and obesity in  
685 human disease. *World J Diabetes.* 2012;3:1–6.
- 686 8. Liu Y, Bastly N, Whitcher B, Bell JD, Sorokin EP, van Bruggen N, et al. Genetic  
687 architecture of 11 organ traits derived from abdominal MRI using deep learning. *Elife.*  
688 2021;10.
- 689 9. Lu Y-C, Untaroiu CD. Statistical shape analysis of clavicular cortical bone with  
690 applications to the development of mean and boundary shape models. *Comput Methods*  
691 *Programs Biomed.* 2013;111:613–28.
- 692 10. Audenaert EA, Pattyn C, Steenackers G, De Roeck J, Vandermeulen D, Claes P.  
693 Statistical Shape Modeling of Skeletal Anatomy for Sex Discrimination: Their Training Size,  
694 Sexual Dimorphism, and Asymmetry. *Front Bioeng Biotechnol.* 2019;7:302.
- 695 11. Yates KM, Untaroiu CD. Finite element modeling of the human kidney for probabilistic  
696 occupant models: Statistical shape analysis and mesh morphing. *J Biomech.* 2018;74:50–6.



- 697 12. Yates KM, Lu Y-C, Untaroiu CD. Statistical shape analysis of the human spleen  
698 geometry for probabilistic occupant models. *J Biomech.* 2016;49:1540–6.
- 699 13. Soufi M, Otake Y, Hori M, Moriguchi K, Imai Y, Sawai Y, et al. Liver shape analysis using  
700 partial least squares regression-based statistical shape model: application for understanding  
701 and staging of liver fibrosis. *Int J Comput Assist Radiol Surg.* 2019;14:2083–93.
- 702 14. Penny WD, Friston KJ, Ashburner JT, Kiebel SJ, Nichols TE. *Statistical Parametric  
703 Mapping: The Analysis of Functional Brain Images.* Elsevier; 2011.
- 704 15. Temporal-lobe morphology differs between healthy adolescents and those with early-  
705 onset of depression. *NeuroImage: Clinical.* 2014;6:145–55.
- 706 16. Biffi C, de Marvao A, Attard MI, Dawes TJW, Whiffin N, Bai W, et al. Three-dimensional  
707 cardiovascular imaging-genetics: a mass univariate framework. *Bioinformatics.* 2018;34:97–  
708 103.
- 709 17. Gilbert K, Bai W, Mauger C, Medrano-Gracia P, Suinesiaputra A, Lee AM, et al.  
710 Independent Left Ventricular Morphometric Atlases Show Consistent Relationships with  
711 Cardiovascular Risk Factors: A UK Biobank Study. *Sci Rep.* 2019;9:1130.
- 712 18. Jia S, Nivet H, Harrison J, Pennec X, Camaioni C, Jaïs P, et al. Left atrial shape is  
713 independent predictor of arrhythmia recurrence after catheter ablation for atrial fibrillation: A  
714 shape statistics study. *Heart Rhythm O2.* 2021;2 6Part A:622–32.
- 715 19. Bruse JL, McLeod K, Biglino G, Ntsinjana HN, Capelli C, Hsia T-Y, et al. A statistical  
716 shape modelling framework to extract 3D shape biomarkers from medical imaging data:  
717 assessing arch morphology of repaired coarctation of the aorta. *BMC Med Imaging.*  
718 2016;16:40.

- 719 20. Littlejohns TJ, Holliday J, Gibson LM, Garratt S, Oesingmann N, Alfaro-Almagro F, et al.  
720 The UK Biobank imaging enhancement of 100,000 participants: rationale, data collection,  
721 management and future directions. *Nat Commun.* 2020;11:2624.
- 722 21. Levey AS, Stevens LA, Schmid CH, Zhang YL, Castro AF 3rd, Feldman HI, et al. A new  
723 equation to estimate glomerular filtration rate. *Ann Intern Med.* 2009;150:604–12.
- 724 22. Thanaj M, Bastay N, Liu Y, Cule M, Sorokin EP, Louise Thomas E, et al. Mass Univariate  
725 Regression Analysis for Three-Dimensional Liver Image-Derived Phenotypes. *Medical*  
726 *Image Understanding and Analysis.* 2021;:165–76.
- 727 23. Thanaj M, Bastay N, Cule M, Sorokin EP, Witcher B, Bell JD, et al. Liver shape is  
728 associated with disease and anthropometric traits. *bioRxiv.* 2022.
- 729 24. Bai W, Shi W, de Marvao A, Dawes TJW, O'Regan DP, Cook SA, et al. A bi-ventricular  
730 cardiac atlas built from 1000 high resolution MR images of healthy subjects and an analysis  
731 of shape and motion. *Medical Image Analysis.* 2015;26:133–45.
- 732 25. Guillaume B, Wang C, Poh J, Shen MJ, Ong ML, Tan PF, et al. Improving mass-  
733 univariate analysis of neuroimaging data by modelling important unknown covariates:  
734 Application to Epigenome-Wide Association Studies. *Neuroimage.* 2018;173:57–71.
- 735 26. Smith SM, Nichols TE. Threshold-free cluster enhancement: addressing problems of  
736 smoothing, threshold dependence and localisation in cluster inference. *Neuroimage.*  
737 2009;44:83–98.
- 738 27. Biffi et al. 2017. Biffi C. An introduction to mass univariate analysis of three-dimensional  
739 phenotypes, <https://github.com/UK-Digital-Heart-Project/mutools3D>, R package version 1.0  
740 (2017).

- 741 28. Benjamini Y, Hochberg Y. Controlling the False Discovery Rate: A Practical and  
742 Powerful Approach to Multiple Testing. *Journal of the Royal Statistical Society: Series B*  
743 (Methodological). 1995;57:289–300.
- 744 29. Dryden IL, . Dryden IL, Mardia KV. *Statistical Shape Analysis*. Wiley-Blackwell; 1998.
- 745 30. Heimann T, Meinzer H-P. Statistical shape models for 3D medical image segmentation:  
746 a review. *Med Image Anal*. 2009;13:543–63.
- 747 31. Heymsfield SB, Olafson RP, Kutner MH, Nixon DW. A radiographic method of  
748 quantifying protein-calorie undernutrition. *The American Journal of Clinical Nutrition*.  
749 1979;32:693–702.
- 750 32. Sharma K, Caroli A, Van Quach L, Petzold K, Bozzetto M, Serra AL, et al. Kidney  
751 volume measurement methods for clinical studies on autosomal dominant polycystic kidney  
752 disease. *PLOS ONE*. 2017;12:e0178488.
- 753 33. Di Zazzo G, Stringini G, Matteucci MC, Muraca M, Malena S, Emma F. Serum creatinine  
754 levels are significantly influenced by renal size in the normal pediatric population. *Clin J Am*  
755 *Soc Nephrol*. 2011;6:107–13.
- 756 34. Rigalleau V, Garcia M, Lasseur C, Laurent F, Montaudon M, Raffaitin C, et al. Large  
757 kidneys predict poor renal outcome in subjects with diabetes and chronic kidney disease.  
758 *BMC Nephrol*. 2010;11:3.
- 759 35. Korkmaz M, Aras B, Güneşli S, Yılmaz M. Clinical significance of renal cortical thickness  
760 in patients with chronic kidney disease. *Ultrasonography*. 2018;37:50–4.
- 761 36. Piras D, Masala M, Delitala A, Urru SAM, Curreli N, Balaci L, et al. Kidney size in relation  
762 to ageing, gender, renal function, birthweight and chronic kidney disease risk factors in a  
763 general population. *Nephrology Dialysis Transplantation*. 2020;35:640–7.

- 764 37. Paul L, Talhar S, Sontakke B, Shende M, Waghmare J. Relation between Renal Length  
765 and Renal Volume with Patient's BMI: A Critical Appraisal. *Anatomy & Physiology*. 2016;06.
- 766 38. Shankar A, Klein R, Klein BEK. The association among smoking, heavy drinking, and  
767 chronic kidney disease. *Am J Epidemiol*. 2006;164:263–71.
- 768 39. Xu H, Garcia-Ptacek S, Trevisan M, Evans M, Lindholm B, Eriksdotter M, et al. Kidney  
769 Function, Kidney Function Decline, and the Risk of Dementia in Older Adults: A Registry-  
770 Based Study. *Neurology*. 2021;96:e2956–65.
- 771 40. Sanusi AA, Arogundade FA, Famurewa OC, Akintomide AO, Soyinka FO, Ojo OE, et al.  
772 Relationship of ultrasonographically determined kidney volume with measured GFR,  
773 calculated creatinine clearance and other parameters in chronic kidney disease (CKD).  
774 *Nephrol Dial Transplant*. 2009;24:1690–4.
- 775 41. Paleologo G, Abdelkawy H, Barsotti M, Basha A, Bernabini G, Bianchi A, et al. Kidney  
776 dimensions at sonography are correlated with glomerular filtration rate in renal transplant  
777 recipients and in kidney donors. *Transplant Proc*. 2007;39:1779–81.
- 778 42. Van Den Noortgate N, Velghe A, Petrovic M, Vandewiele C, Lameire N, Voet D, et al.  
779 The role of ultrasonography in the assessment of renal function in the elderly. *J Nephrol*.  
780 2003;16:658–62.
- 781 43. Derchi LE, Martinoli C, Saffioti S, Pontremoli R, De Micheli A, Bordone C.  
782 Ultrasonographic imaging and Doppler analysis of renal changes in non-insulin-dependent  
783 diabetes mellitus. *Acad Radiol*. 1994;1:100–5.
- 784 44. Okada R, Yasuda Y, Tsushita K, Wakai K, Hamajima N, Matsuo S. Glomerular  
785 hyperfiltration in prediabetes and prehypertension. *Nephrol Dial Transplant*. 2012;27:1821–  
786 5.

- 787 45. Schnaper HW. Remnant nephron physiology and the progression of chronic kidney  
788 disease. *Pediatr Nephrol.* 2014;29:193–202.
- 789 46. Bonazzola R, Ravikumar N, Attar R, Ferrante E, Syeda-Mahmood T, Frangi AF. Image-  
790 Derived Phenotype Extraction for Genetic Discovery via Unsupervised Deep Learning in  
791 CMR Images. *Medical Image Computing and Computer Assisted Intervention – MICCAI*  
792 2021. 2021;:699–708.
- 793 47. Smith SM, Elliott LT, Alfaro-Almagro F, McCarthy P, Nichols TE, Douaud G, et al. Brain  
794 aging comprises many modes of structural and functional change with distinct genetic and  
795 biophysical associations. *Elife.* 2020;9.
- 796 48. Sonographic measurement of renal size in normal high altitude populations. *Journal of*  
797 *Radiation Research and Applied Sciences.* 2017;10:178–82.
- 798 49. Araújo NC, Rebelo MAP, da Silveira Rioja L, Suassuna JHR. Sonographically  
799 determined kidney measurements are better able to predict histological changes and a low  
800 CKD-EPI eGFR when weighted towards cortical echogenicity. *BMC Nephrol.* 2020;21:123.
- 801 50. Munafò MR, Tilling K, Taylor AE, Evans DM, Davey Smith G. Collider scope: when  
802 selection bias can substantially influence observed associations. *Int J Epidemiol.*  
803 2018;47:226–35.
- 804 51. Lyall DM, Quinn T, Lyall LM, Ward J, Anderson JJ, Smith DJ, et al. Quantifying bias in  
805 psychological and physical health in the UK Biobank imaging sub-sample. *Brain Commun.*  
806 2022;4:fcac119.
- 807 52. Batty GD, Gale CR, Kivimäki M, Deary IJ, Bell S. Comparison of risk factor associations  
808 in UK Biobank against representative, general population based studies with conventional  
809 response rates: prospective cohort study and individual participant meta-analysis. *BMJ.*  
810 2020;368:m131.

811 53. Gerstein HC, Mann JF, Yi Q, Zinman B, Dinneen SF, Hoogwerf B, et al. Albuminuria and  
812 risk of cardiovascular events, death, and heart failure in diabetic and nondiabetic individuals.  
813 JAMA. 2001;286:421–6.

814 54. Matsushita K, Coresh J, Sang Y, Chalmers J, Fox C, Guallar E, et al. Estimated  
815 glomerular filtration rate and albuminuria for prediction of cardiovascular outcomes: a  
816 collaborative meta-analysis of individual participant data. Lancet Diabetes Endocrinol.  
817 2015;3:514–25.

818 55. Predictors and determinants of albuminuria in people with prediabetes and diabetes  
819 based on smoking status: A cross-sectional study using the UK Biobank data.  
820 eClinicalMedicine. 2022;51:101544.

821 56. Zhu P, Lewington S, Haynes R, Emberson J, Landray MJ, Cherney D, et al. Cross-  
822 sectional associations between central and general adiposity with albuminuria: observations  
823 from 400,000 people in UK Biobank. Int J Obes. 2020;44:2256–66.
